# Supplementary material
Source: PubMed Central journal article supplement (PMC5572902)
Supplement: 10.1074_M117.799304_jbc.M117.799304-2.pdf [file 10.1074_M117.799304_jbc.M117.799304-2.pdf]

**SUPPLEMENTAL MATERIALS**

**Function of Inhibitor of Bruton’s Tyrosine Kinase Isoform  $\alpha$  (IBTK $\alpha$ ) in Nonalcoholic Steatohepatitis Links Autophagy and the Unfolded Protein Response**

Jeffrey A. Willy, Sara K. Young, Amber L. Mosley, Samer Gawrieh, James L. Stevens, Howard C. Masuoka, and Ronald C. Wek

**SUPPLEMENTAL TABLES 2-4**

**Supplemental Table 2.** Clinical features and histological evaluation and scoring for NASH for patients that provide liver biopsy samples.

| <b>Features</b>                            | <b>Control<br/>(n = 10)</b> | <b>Simple Steatosis<br/>(n = 10)</b> | <b>NASH<br/>(n = 10)</b> |
|--------------------------------------------|-----------------------------|--------------------------------------|--------------------------|
| Age (mean, std)                            | 42 +/- 12                   | 40 +/- 10                            | 43 +/- 9                 |
| Gender (male/female)                       | 1/9                         | 2/8                                  | 2/8                      |
| BMI (kg/m <sup>2</sup> )                   | 48 +/- 7                    | 51 +/- 5                             | 49 +/- 6                 |
| Weight (lbs)                               | 305 +/- 62                  | 317 +/- 34                           | 308 +/- 56               |
| AST (IU/L)                                 | 22 +/- 7                    | 26 +/- 21                            | 33 +/- 16                |
| ALT (IU/L)                                 | 20 +/- 12                   | 26 +/- 9                             | 35 +/- 20*               |
| Glucose (mg/dL)                            | 110 +/- 26                  | 115 +/- 45                           | 143 +/- 38               |
| Insulin                                    | 22 +/- 10                   | 24 +/- 8                             | 59 +/- 57                |
| Triglycerides (mg/dL)                      | 126 +/- 46                  | 128 +/- 35                           | 342 +/- 312*             |
| <b>Steatosis</b>                           |                             |                                      |                          |
| Grade 0                                    | 10 (100%)                   |                                      |                          |
| Grade 1                                    |                             | 6 (60%)                              | 4 (40%)                  |
| Grade 2                                    |                             | 3 (30%)                              | 6 (50%)                  |
| Grade 3                                    |                             | 1 (10%)                              |                          |
| <b>Fibrosis</b>                            |                             |                                      |                          |
| Absent                                     | 10 (100%)                   | 10 (100%)                            | 5 (50%)                  |
| Present                                    |                             |                                      | 5 (50%)                  |
| <b>Ballooning and Lobular Inflammation</b> |                             |                                      |                          |
| Absent                                     | 10 (100%)                   | 10 (100%)                            | 2 (20%)                  |
| Present                                    |                             |                                      | 8 (80%)                  |

\* indicates P<0.05 compared to control and simple steatosis.

**Supplemental Table 3.** Cytokine panel on serum from patients providing liver biopsy samples.

| <b>Cytokine</b> | <b>Control<br/>(n = 9)</b> | <b>Simple Steatosis<br/>(n = 10)</b> | <b>NASH<br/>(n = 10)</b> |
|-----------------|----------------------------|--------------------------------------|--------------------------|
| IL-8            | 281 +/- 126                | 276 +/- 188                          | 1039 +/- 840*            |
| TNF $\alpha$    | 10.45 +/- 6                | 35 +/- 27*                           | 24 +/- 20*               |
| IL-6            | 47 +/- 26                  | 82 +/- 49*                           | 73 +/- 32*               |
| IL-2            | 29 +/- 18                  | 62 +/- 71                            | 51 +/- 72                |
| IL-4            | 27 +/- 14                  | 44 +/- 45                            | 18 +/- 5                 |
| IL-5            | 16 +/- 9                   | 20 +/- 19                            | 15 +/- 7                 |
| IL-1b           | 67 +/- 43                  | 120 +/- 81                           | 84 +/- 53                |
| IL-10           | 35 +/- 20                  | 49 +/- 44                            | 44 +/- 22                |
| GM-CSF          | 16 +/- 15                  | 100 +/- 223                          | 15 +/- 10                |
| INF- $\gamma$   | 48 +/- 19                  | 55 +/- 29                            | 45 +/- 27                |
| HMGB1           | 2 +/- 1.5                  | 2 +/- 1.3                            | 3 +/- 2                  |

\* indicates P<0.05 compared to control and simple steatosis.

**Supplemental Table 4.** Primers for quantitative PCR.

| <b>GENE_ID</b>                 | <b>Species</b> | <b>Primer</b> | <b>Sequence</b>              |
|--------------------------------|----------------|---------------|------------------------------|
| <i>GAPDH</i>                   | Homo sapien    | Forward       | 5'-AGGGCTGCTTTTAACTCTGGT-3'  |
|                                |                | Reverse       | 5'-CCCCACTTGATTTTGGAGGGA-3'  |
| <i>ATF4</i>                    | Homo sapien    | Forward       | 5'-TCAAACCTCATGGGTCTCC-3'    |
|                                |                | Reverse       | 5'-GTGTCATCCAACGTGGTCAG-3'   |
| <i>CHOP/DDIT3</i>              | Homo sapien    | Forward       | 5'-AGGAACCAGGAAACGAAACAGA-3' |
|                                |                | Reverse       | 5'-TCTCCTTCATGCGCTGCTT-3'    |
| <i>CXCL8</i>                   | Homo sapien    | Forward       | 5'-CTGCGCCAACACAGAAATTA-3'   |
|                                |                | Reverse       | 5'-ATTGCATCTGGCAACCCTAC-3'   |
| <i>TNFA</i>                    | Homo sapien    | Forward       | 5'-CTCTCTCCCCTGGAAAGGAC-3'   |
|                                |                | Reverse       | 5'-GCCAGAGGGCTGATTAGAGA-3'   |
| <i>IBTK<math>\alpha</math></i> | Homo sapien    | Forward       | 5'-CCGCCTTCCAGTTGTAATG-3'    |
|                                |                | Reverse       | 5'-AGCAAACAACCCAGTTGTCC-3'   |
| <i>SQSM1</i>                   | Homo sapien    | Forward       | 5'-CACCTGTCTGAGGGCTTCTC-3'   |
|                                |                | Reverse       | 5'-CACACTCTCCCCAACGTTCT-3'   |
| <i>MAP1LC3B</i>                | Homo sapien    | Forward       | 5'-ATTCGAGAGCAGCATCCAAC-3'   |
|                                |                | Reverse       | 5'-CTGTGTCCGTTACCAACAG-3'    |
