# Supplementary material
Source: PubMed Central journal article supplement (PMC5572902)
Supplement: 10.1074_M117.799304_jbc.M117.799304-3.pdf [file 10.1074_M117.799304_jbc.M117.799304-3.pdf]

## SUPPLEMENTAL FIGURES

### Function of Inhibitor of Bruton's Tyrosine Kinase Isoform $\alpha$ (IBTK $\alpha$ ) in Nonalcoholic Steatohepatitis Links Autophagy and the Unfolded Protein Response

Jeffrey A. Willy, Sara K. Young, Amber L. Mosley, Samer Gawrieh, James L. Stevens, Howard C. Masuoka, and Ronald C. Wek

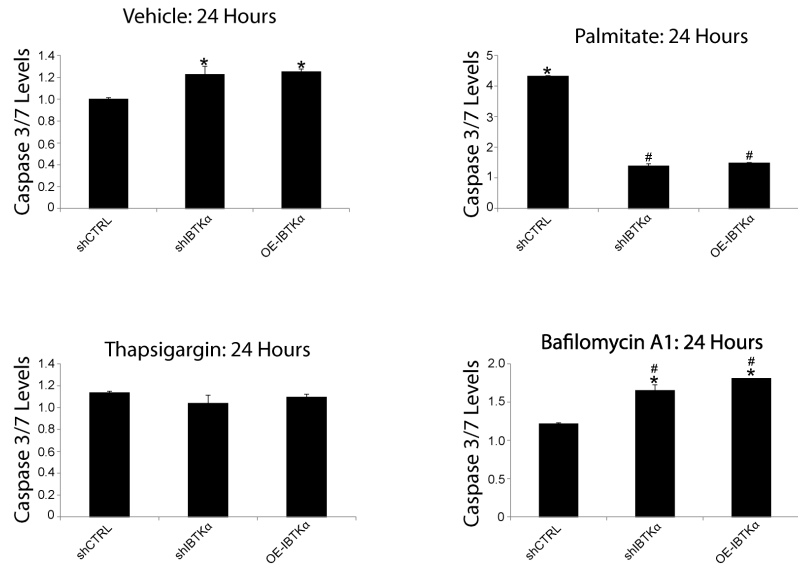

Supplemental Figure 1. Effects of changes in IBTK $\alpha$  expression on levels of caspase 3/7 in HepG2 cells. HepG2 cells expressing shIBTK $\alpha$  or control (shCTRL) or overexpressing a flagged tagged version of IBTK $\alpha$  (OE-IBTK $\alpha$ ) were treated with palmitate, thapsigargin, bafilomycin A1, or vehicle for 24 hours. Lysates were prepared and caspase 3/7 activity was measured by the Apo-One biochemical assay.

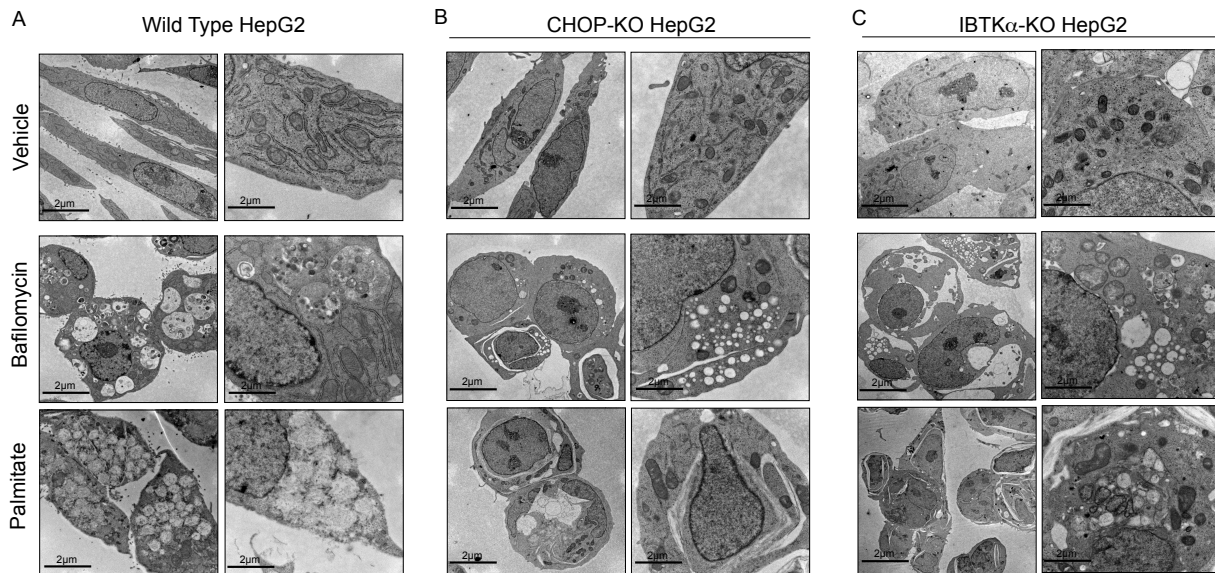

Supplemental Figure 2. Electron microscopy showing ultrastructural features of WT (A), CHOP-KO (B), and IBTK $\alpha$ -KO (C) cells. This collection of HepG2-derived cells were treated with vehicle, bafilomycin A1, or palmitate for 12 hours.

### IBTK $\alpha$ -KO

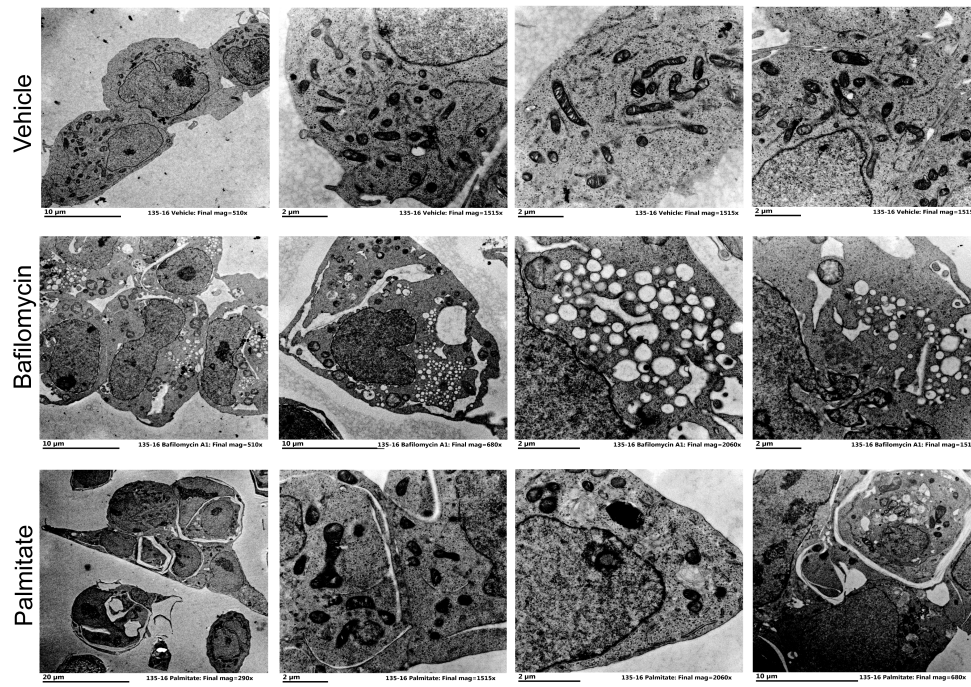

Supplemental Figure 3. Electron microscopy showing ultrastructural features of IBTK $\alpha$ -KO HepG2 cells treated with vehicle, bafilomycin A1, or palmitate for 12 hours.

### CHOP-KO

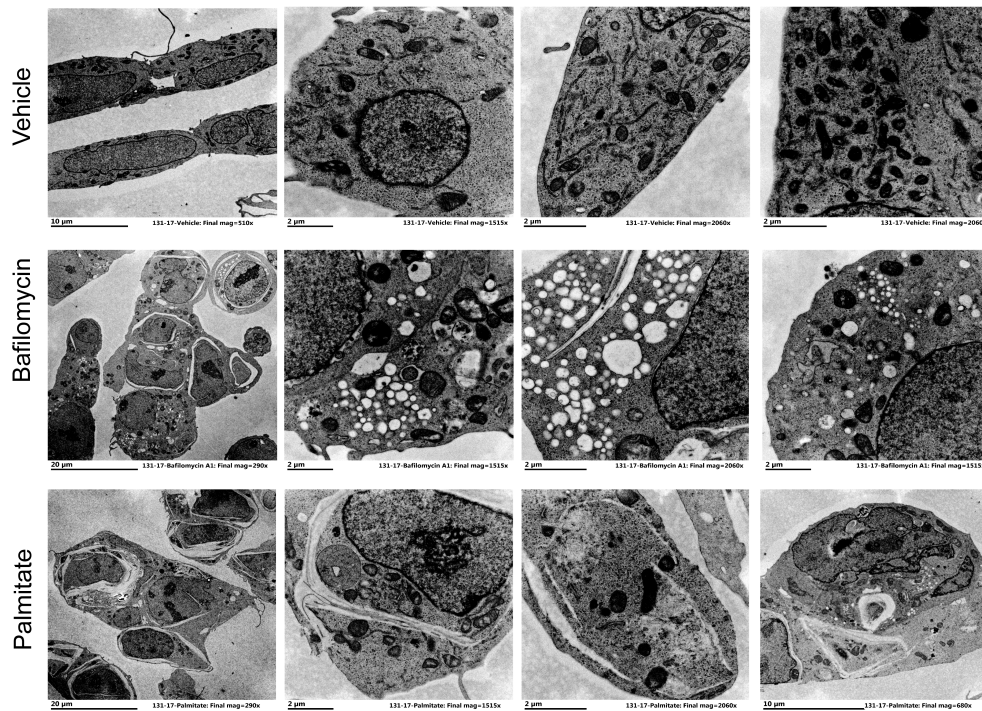

Supplemental Figure 4. Electron microscopy showing ultrastructural features of CHOP-KO HepG2 cells treated with vehicle, bafilomycin A1, or palmitate for 12 hours.
